# Supplementary material
Source: publisher figshare collection journal article supplement (https://frontiersin.figshare.com/ndownloader/files/20024867)

## *Supplementary Material 4*

**Supplementary Figure 4.** Seasonal distribution of 114 reported and 95 investigated greenfinch disease events with focus on trichomonosis

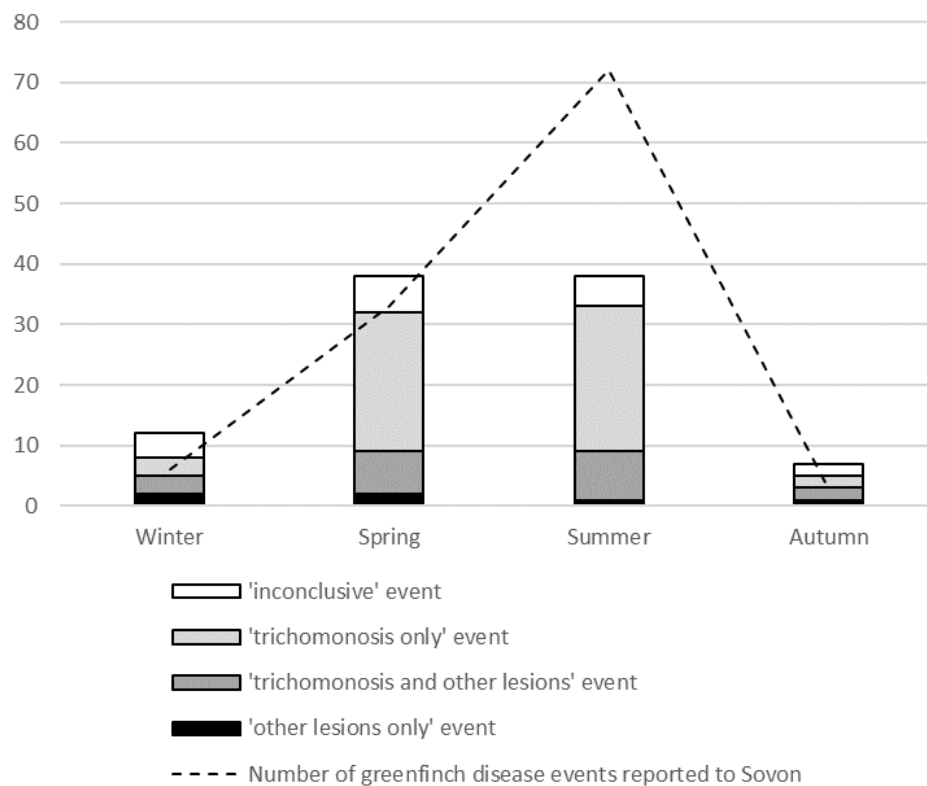

Supplement: Supplementary file [file 20024867]
